# Supplementary material for: Hypermetabolism of the spleen or bone marrow is an additional albeit indirect sign of infective endocarditis at FDG-PET
Source: Springer Nature journal article supplement (doi:10.1007/s12350-020-02050-2), 2020-02-10
Supplement: MOESM1 [file 17666574]

**Supplemental Table 4:** Comparison of median values [± 95% CI] for SUVmean from liver, BM and spleen, as well as for BM- and spleen-to-liver SUVmean ratios, between patients categorized according to the presence or absence of obesity (+/-) and/or hyperglycemia (+/-).

|  | Obesity –  Hyperglycemia - | Obesity +  Hyperglycemia - | Obesity -  Hyperglycemia + | Obesity +  Hyperglycemia + | Global  P value |
| --- | --- | --- | --- | --- | --- |
|  | (n=86) | (n=21) | (n=18) | (n=4) |  |
| Liver SUVmean | 2.02 [1.72-2.30] | 2.41 [2.17-2.97] ***** | 2.45 [2.17-2.74] ***** | 3.11 [2.63-3.52] ***** | < 0.001 |
| BM SUVmean | 2.13 [1.87-2.45] | 2.41 [2.06-2.63] | 2.40 [1.79-2.79] | 2.36 [1.94-2.62] | 0.368 |
| Spleen SUVmean | 2.24 [1.91-2.59] | 2.76 [2.07-3.11] | 2.52 [2.04-2.89] | 2.91 [2.44-3.02] | 0.021 |
| BM/liver SUVmean ratio | 1.12 [0.84-1.30] | 0.92 [0.76-1.07] | 0.95 [0.80-1.16] | 0.75 [0.64-0.87] | 0.014 |
| Spleen/liver SUVmean ratio | 1.10 [0.99-1.27] | 1.04 [0.87-1.04] | 1.05 [0.93-1.18] | 0.92 [0.83-0.97] | 0.044 |

*: p<0.05 for the comparisons with the group Obesity - / Hyperglycemia -
